# Supplementary material
Source: publisher figshare collection journal article supplement (https://frontiersin.figshare.com/ndownloader/files/21980901)
Supplement: Supplementary file [file 21980901]

## Supplementary material

**Table 1** Narrow Standardised MedDRA Queries with their respective Preferred Terms for dementia-related events and Parkinson-related events for the study outcomes of interest

|                       | <b>Dementia: narrow SMQ</b>                           | <b>Parkinson-like events: narrow: SMQ</b> |
|-----------------------|-------------------------------------------------------|-------------------------------------------|
| <b>Preferred Term</b> | Clinical dementia rating scale score abnormal         | Akinesia                                  |
|                       | Corticobasal degeneration                             | Bradykinesia                              |
|                       | Creutzfeldt-Jakob disease                             | Cogwheel rigidity                         |
|                       | Dementia                                              | Freezing phenomenon                       |
|                       | Dementia Alzheimer's type                             | Hypertonia                                |
|                       | Dementia of the Alzheimer's type, uncomplicated       | Hypertonia neonatal                       |
|                       | Dementia of the Alzheimer's type, with delirium       | Muscle rigidity                           |
|                       | Dementia of the Alzheimer's type, with delusions      | On and off phenomenon                     |
|                       | Dementia of the Alzheimer's type, with depressed mood | Parkinsonian crisis                       |
|                       | Dementia with Lewy bodies                             | Parkinsonian gait                         |
|                       | Early onset familial Alzheimer's disease              | Parkinsonian rest tremor                  |
|                       | Frontotemporal dementia                               | Parkinsonism                              |
|                       | Hippocampal sclerosis                                 | Parkinsonism hyperpyrexia syndrome        |
|                       | Korsakoff's syndrome                                  | Parkinson's disease                       |
|                       | Mini mental status examination abnormal               | Parkinson's disease psychosis             |
|                       | Mixed dementia                                        | Resting tremor                            |
|                       | Presenile dementia                                    |                                           |
|                       | Prion disease                                         |                                           |
|                       | Progressive supranuclear palsy                        |                                           |
|                       | Scatolia                                              |                                           |
|                       | Senile dementia                                       |                                           |
|                       | Variant Creutzfeldt-Jakob disease                     |                                           |

**Abbreviations:** SMQ: Standardised MedDRA® Queries
